# Supplementary material for: Tissue-specific features of the X chromosome and nucleolus spatial dynamics in a malaria mosquito, Anopheles atroparvus
Source: PLoS One. 2017 Feb 3;12(2):e0171290. doi: 10.1371/journal.pone.0171290 (PMC5291520; doi:10.1371/journal.pone.0171290)
Supplement: S1 Table — (CSV) [file pone.0171290.s001.csv]

Tissue	X_volume	X_surface	Nuc_volume	X_elongation	X_compacity	X_LD	X_efv	X_rel_ellong	X_DC_avg	X_DC_sd	X_efvMax	X_evfMean	X_efvMin	Nuc_DCavg	XN	RPdist	RPmdist	LDtoShellDegree
Nurse c.	347.92	474.75	3111.77	1.14	0.04	12.68	0.8	0.79	4.34	1.02	0.97	0.55	0.01	9.5	0.111807749287383	0.96	9.12	45.9920083694999
Nurse c.	804.21	1000.27	7063.24	1.37	0.03	22.75	0.61	0.64	5.47	2.22	0.97	0.55	0.01	12.46	0.113858512523997	0.96	11.9616	31.7210782061772
Nurse c.	611.26	762.82	6532.07	1.44	0.03	17.8	0.86	0.61	5.55	1.74	0.97	0.59	0.01	12.28	0.0935782990690547	0.96	11.7888	41.4749191900002
Nurse c.	105.19	205	1955.38	2.7	0.1	11.66	0.73	0.89	3.91	1.3	0.95	0.59	0.01	7.84	0.0537951702482382	0.94	7.3696	39.200877153275
Nurse c.	132.17	240.34	3960.51	1.64	0.05	11.58	0.71	0.87	3.5	1.05	0.96	0.66	0.01	9.99	0.0333719647217151	0.95	9.4905	55.040730843703
Nurse c.	141.06	236.09	3165.73	1.13	0.1	9.7	0.54	0.92	3.48	0.61	0.88	0.43	0.01	9.2	0.0445584430763205	0.87	8.004	55.6041725005313
Nurse c.	40.06	121.95	1188.11	1.69	0.05	9.5	0.56	0.41	2.86	1.35	0.89	0.44	0.01	6.52	0.0337174167375075	0.88	5.7376	37.1538900017023
Nurse c.	81.2	168.38	2357.05	2.5	0.15	11.81	0.57	0.89	3.59	1.25	0.87	0.46	0.01	8.39	0.0344498419634713	0.86	7.2154	37.6587192091043
Nurse c.	167.99	345.26	2759.59	2.44	0.02	17.18	0.64	0.55	4.46	1.93	0.98	0.54	0.01	9	0.0608749850521273	0.97	8.73	30.5406147285516
Nurse c.	87.77	179.76	1285.96	1.94	0.05	9.83	0.79	0.75	2.99	1.04	1	0.6	0.01	6.62	0.0682525117422004	0.99	6.5538	41.8139643214226
Nurse c.	30.33	81.94	708.44	1.22	0.12	5.33	0.97	0.92	2	0.41	1	0.88	0.16	5.65	0.0428123764891875	0.84	4.746	62.9275216252156
Nurse c.	94.84	173.8	2373.26	1.47	0.09	7.92	0.75	0.9	2.92	0.54	0.98	0.63	0.01	8.08	0.0399619089353885	0.97	7.8376	81.7278976295443
Nurse c.	60.83	157.52	1232.25	1.45	0.05	8.42	0.79	0.61	2.71	0.94	1	0.6	0.01	6.48	0.0493649827551227	0.99	6.4152	49.6320062228281
Nurse c.	64.69	142.34	1223.95	1.76	0.05	7.99	0.58	0.91	2.45	0.7	0.96	0.59	0.01	6.52	0.0528534662363659	0.95	6.194	50.8248942455179
Nurse c.	111.21	207.02	2577.79	1.83	0.07	9.64	0.65	0.88	3.18	0.79	0.92	0.62	0.01	8.44	0.0431416057941105	0.91	7.6804	52.8182059730777
Nurse c.	72.8	163.05	1203.63	1.95	0.05	9.65	0.75	0.73	2.87	1.06	0.99	0.62	0.01	6.52	0.060483703463689	0.98	6.3896	41.4628822132582
Nurse c.	78.29	154.25	2231.03	1.65	0.09	7.77	0.81	0.89	2.77	0.57	0.99	0.68	0.01	7.89	0.0350914151759501	0.98	7.7322	84.3460854134842
Nurse c.	40.14	95.53	1139.14	1.74	0.09	6.16	0.64	0.92	2.07	0.45	0.91	0.49	0.01	6.28	0.0352371086960338	0.9	5.652	66.5679703478504
Nurse c.	82.18	171.45	2479.84	1.94	0.04	9.73	0.63	0.85	2.99	0.99	0.95	0.57	0.01	8.56	0.0331392347893412	0.94	8.0464	55.7885407132279
Nurse c.	101.02	177.98	2947.16	1.04	0.07	7.49	0.84	0.94	2.74	0.51	1	0.82	0.01	8.95	0.0342770667354334	0.99	8.8605	NA
Fol ep.	5.27	24.5	38.37	1.23	0.1	3.08	0.87	0.89	1.02	0.2	0.99	0.62	0.04	2.03	0.137346885587699	0.95	1.9285	38.765642211911
Fol ep.	8.39	38.11	40.75	1.34	0.08	3.61	0.87	0.76	1.26	0.32	1	0.72	0.04	2.06	0.205889570552147	0.96	1.9776	33.2170110942826
Fol ep.	3.54	19.85	38.91	2.11	0.14	3.43	0.74	0.9	1.02	0.33	0.97	0.58	0.04	2.02	0.0909791827293755	0.93	1.8786	33.2091463855087
Fol ep.	5.06	28.54	41.93	1.84	0.06	3.48	0.8	0.67	1.07	0.33	1	0.58	0.04	2.08	0.12067731934176	0.96	1.9968	35.0151562341317
Fol ep.	2.19	13.71	34.56	1.39	0.06	2.32	0.61	0.85	0.72	0.21	0.93	0.53	0.04	1.94	0.0633680555555556	0.89	1.7266	48.092501471447
Fol ep.	3.36	18.61	40.98	1.38	0.13	2.69	0.82	0.84	0.94	0.22	0.99	0.74	0.04	2.08	0.08199121522694	0.95	1.976	47.2711044645618
Fol ep.	7.9	33.9	36.13	1.33	0.1	3.1	0.95	0.87	1.17	0.24	0.99	0.81	0.04	1.97	0.218654857459175	0.95	1.8715	37.1360482981745
Fol ep.	1.81	13.65	24.22	1.35	0.07	2.4	0.68	0.86	0.72	0.21	0.87	0.39	0.05	1.75	0.0747316267547481	0.82	1.435	36.7208351455904
Fol ep.	2.12	14.84	33.45	2.95	0.07	3.17	0.89	0.77	0.88	0.39	1	0.8	0.17	1.91	0.0633781763826607	0.83	1.5853	30.0062613458767
Fol ep.	1.66	12.05	22.75	1.68	0.1	2.38	0.7	0.89	0.72	0.21	0.98	0.6	0.05	1.69	0.072967032967033	0.93	1.5717	41.3287191342129
Fol ep.	3.35	20.05	18.23	1.63	0.08	2.83	0.8	0.85	0.89	0.26	0.98	0.54	0.05	1.57	0.183763027975864	0.93	1.4601	31.0600655420346
Fol ep.	2.68	16.57	26.38	1.57	0.09	2.67	0.83	0.84	0.84	0.22	1	0.63	0.04	1.78	0.101592115238817	0.96	1.7088	39.7918194995572
Fol ep.	3.26	17.16	23.35	1.4	0.11	2.29	0.79	0.96	0.84	0.16	1	0.65	0.05	1.71	0.139614561027837	0.95	1.6245	45.1851956581758
Fol ep.	2.87	17.61	26.33	1.79	0.12	3.11	0.7	0.8	0.97	0.31	0.97	0.57	0.04	1.8	0.109001139384732	0.93	1.674	32.5655170864695
Fol ep.	1.89	13.2	31.81	1.76	0.09	2.7	0.69	0.86	0.74	0.24	0.99	0.61	0.04	1.88	0.059415278214398	0.95	1.786	41.4129570930688
Fol ep.	1.61	12.77	28.5	1.49	0.07	2.31	0.83	0.63	0.73	0.23	0.95	0.64	0.04	1.81	0.0564912280701754	0.91	1.6471	45.4820070449426
Fol ep.	6.1	26.56	36.81	1.68	0.09	3.32	0.9	0.95	1.06	0.26	1	0.76	0.04	1.99	0.165715838087476	0.96	1.9104	35.1291685258871
Fol ep.	5.13	25.14	41.35	1.54	0.08	3.21	0.7	0.9	1.02	0.26	1	0.64	0.04	2.07	0.124062877871826	0.96	1.9872	38.2479186065545
Fol ep.	3.17	16.6	33.67	1.26	0.16	2.39	0.69	0.96	0.89	0.17	0.95	0.51	0.04	1.97	0.0941490941490941	0.91	1.7927	48.5976272037677
Fol ep.	2.84	15.48	31.29	1.44	0.11	2.3	0.7	0.96	0.79	0.16	0.99	0.6	0.04	1.87	0.0907638223074465	0.95	1.7765	50.5691142216217
Fol ep.	4.24	20.78	31.87	1.44	0.09	2.7	0.86	0.94	0.92	0.19	1	0.63	0.04	1.89	0.133040476937559	0.96	1.8144	42.2216140551463
Fol ep.	5.24	26.32	110.95	1.8	0.05	3.4	0.68	0.84	1.05	0.33	0.96	0.61	0.02	2.78	0.0472284812978819	0.94	2.6132	50.2272823321474
Fol ep.	8.74	36.54	83.76	1.64	0.05	3.89	0.69	0.86	1.27	0.33	0.93	0.52	0.03	2.49	0.104345749761223	0.9	2.241	35.1761797434716
Fol ep.	7.9	32.82	102.43	1.76	0.05	3.88	0.65	0.87	1.19	0.35	0.92	0.37	0.02	2.66	0.0771258420384653	0.9	2.394	38.0981386044366
Fol ep.	3.6	18.83	87.82	1.56	0.06	2.63	0.59	0.92	0.81	0.24	0.86	0.35	0.03	2.56	0.0409929401047597	0.83	2.1248	53.8921105021759
Fol ep.	4.38	21.87	89.85	1.55	0.06	2.97	0.56	0.95	0.92	0.24	0.85	0.39	0.03	2.58	0.0487479131886477	0.82	2.1156	45.4242556500891
Fol ep.	6.17	24.18	100.39	1.34	0.07	2.74	0.75	0.99	0.96	0.2	0.95	0.56	0.02	2.73	0.0614603048112362	0.93	2.5389	67.9117611824096
Fol ep.	9.71	42.9	61.92	1.4	0.03	4.21	0.87	0.74	1.23	0.36	1	0.72	0.03	2.3	0.156815245478036	0.97	2.231	32.0006402772988
Fol ep.	8.29	32.62	75.55	2.07	0.05	3.97	0.76	0.93	1.18	0.37	0.88	0.56	0.02	2.39	0.109728656518862	0.86	2.0554	31.1803079358651
Fol ep.	6.53	26.61	79.42	1.13	0.06	2.83	0.72	0.96	1.02	0.19	0.89	0.36	0.03	2.54	0.0822211029967263	0.86	2.1844	50.5223630457004
Fol ep.	6.93	29.13	94.65	1.24	0.05	3.34	0.73	0.94	1.06	0.26	0.96	0.68	0.02	2.66	0.0732171156893819	0.94	2.5004	48.4712170651078
Fol ep.	7.24	32.29	92.11	1.41	0.06	3.76	0.66	0.91	1.19	0.32	0.89	0.39	0.03	2.61	0.0786016719140158	0.86	2.2446	36.6530599547166
Fol ep.	6.5	29.61	85.85	1.59	0.05	3.27	0.75	0.81	1.07	0.34	0.97	0.63	0.06	2.5	0.075713453698311	0.91	2.275	44.0845123765176
Fol ep.	6.73	28.44	88.01	1.15	0.07	3.18	0.72	0.96	1.09	0.23	0.98	0.64	0.03	2.58	0.076468583115555	0.95	2.451	50.4217102315418
Fol ep.	6.74	28.49	89.65	1.05	0.08	2.94	0.69	0.98	1.1	0.19	0.98	0.62	0.03	2.6	0.0751812604573341	0.95	2.47	57.1544894208547
Fol ep.	10.69	43.96	85.41	1.28	0.05	3.8	0.89	0.72	1.31	0.35	1	0.72	0.03	2.54	0.125160988174687	0.97	2.4638	40.4187004705485
Fol ep.	6.01	28.41	86.19	1.74	0.07	3.71	0.57	0.91	1.12	0.35	0.87	0.41	0.03	2.59	0.0697296670147349	0.84	2.1756	35.9030229693963
Nurse c.	208.92	314.64	6839.4	1.22	0.08	11.34	0.8	0.85	3.76	0.75	0.93	0.57	0.01	12.21	0.0305465391701026	0.92	11.2332	82.130300167016
Nurse c.	147.76	263.31	4471.57	2.03	0.06	10.57	0.58	0.82	3.42	1	1	0.9	0.48	10.6	0.033044322240287	0.52	5.512	31.431302446758
Nurse c.	89.65	201.11	2212.03	1.38	0.05	10.33	0.61	0.78	3.14	0.98	0.89	0.43	0.01	7.97	0.0405283834306045	0.88	7.0136	42.7619980225556
Nurse c.	135.69	309.01	2808.31	1.35	0.02	11.22	0.8	0.47	3.46	1.13	1	0.68	0.01	8.51	0.0483173153960923	0.99	8.4249	48.6668679331565
Nurse c.	151.48	279.51	3049.8	1.71	0.06	12.3	0.54	0.81	3.83	1.13	0.88	0.43	0.01	8.84	0.0496688307429995	0.87	7.6908	38.7018821330036
Nurse c.	133.33	236.1	3800.86	1.27	0.07	8.95	0.69	0.84	3.21	0.65	0.98	0.64	0.01	9.58	0.0350789031955926	0.97	9.2926	NA
