# Supplementary material for: Tissue-specific features of the X chromosome and nucleolus spatial dynamics in a malaria mosquito, Anopheles atroparvus
Source: PLoS One. 2017 Feb 3;12(2):e0171290. doi: 10.1371/journal.pone.0171290 (PMC5291520; doi:10.1371/journal.pone.0171290)
Supplement: S2 Table — (CSV) [file pone.0171290.s002.csv]

Tissue	nli_DCavg	nli_DCsd	nli_compacity	nli_ellong	nli_efv	nli_efvMax	nli_efvMean	nli_efvMin	nli_LD	nli_rel_ellong	nli_surface	nli_volume	Nuc_volume
Nurse C.	3.694942	0.685143	0.052202	1.126519	0.903387	0.996084	0.784777	0	9.909073	0.893214	346.379977	270.077006	1363.638248
Nurse C.	2.933094	0.549728	0.075575	1.294486	0.991984	0.996267	0.886469	0.030137	8.09676	0.931352	204.394105	135.209089	762.8343525
Nurse C.	4.429146	1.041472	0.04238	1.300697	0.885536	0.988235	0.761652	0	13.314255	0.932959	473.194874	444.940779	1515.748473
Nurse C.	2.438735	0.314349	0.096548	1.066096	0.796838	0.991214	0.754648	0	6.36712	0.966329	142.841233	81.61884	1206.777859
Nurse C.	3.836194	1.063549	0.064014	1.599585	0.980934	0.999671	0.767716	0	11.604669	0.707941	335.791657	219.688525	1516.903209
Nurse C.	3.036411	0.525805	0.095751	1.198793	0.968908	0.999323	0.890093	0.464672	8.127645	0.904265	210.659617	127.362133	833.1157849
Nurse C.	3.808897	0.717261	0.068903	1.245649	0.999403	0.972835	0.807668	0.026901	10.639017	0.808969	341.757145	245.145205	746.7992684
Nurse C.	5.551966	1.605446	0.024791	1.045556	0.993245	0.995027	0.770727	0.016519	16.437735	0.739222	857.460172	782.989745	2599.179531
Nurse C.	3.845689	0.743387	0.049589	1.352691	0.97807	0.999223	0.796261	0	11.056426	0.865457	371.706409	269.44715	1013.622018
Nurse C.	3.994592	0.945949	0.065405	1.583638	0.94053	0.999922	0.790788	0	12.998013	0.845728	352.289737	247.244725	1180.035223
Nurse C.	3.015892	0.458383	0.111737	1.219949	0.97888	0.98889	0.877723	0.223215	7.775565	0.919906	190.714825	122.743189	596.4473915
Nurse C.	3.825554	0.443453	0.106838	1.1302	0.977002	0.974728	0.832832	0.213277	10.251407	0.960339	314.581969	251.653717	819.3376848
Malpig	3.28329	0.350482	0.08321	1.053216	0.991899	0.962738	0.84447	0.031088	7.974178	0.980355	251.874361	195.701509	728.953348
Malpig	2.96537	0.380689	0.111845	1.292311	0.993577	0.991241	0.914344	0.477549	7.768812	0.989482	191.753569	130.222729	853.901033
Malpig	3.082837	0.320061	0.092033	1.134286	0.989639	0.998705	0.836129	0.100268	7.685932	0.99358	216.184465	164.681101	851.040437
Malpig	2.451721	0.397804	0.130377	1.328603	0.981173	0.99987	0.911726	0.637036	6.698262	0.975092	124.848216	67.368348	805.690805
Malpig	3.403022	0.300847	0.097523	1.076868	0.976159	0.995807	0.856136	0.075191	7.956317	0.983691	259.893361	199.953037	998.400498
Malpig	3.714465	0.502041	0.123433	1.276241	0.984657	0.980002	0.825476	0.038326	9.570924	0.984573	274.944457	214.256017	848.416037
Malpig	2.440275	0.307396	0.121301	1.219346	0.970606	0.999839	0.898396	0.380441	6.275485	0.981511	133.232041	77.104872	813.380297
FE	1.62021476649318	0.411368015070001	0.0959627124214671	1.30143401955101	0.829914726895598	0.99815625720212	0.743719751094722	0.0621110855035722	5.03416967391968	0.926143965574478	67.8125522504297	23.0947201359558	113.872716670355
FE	1.50412305165858	0.384007150611281	0.0851848819798766	1.45284224901591	0.814285714285714	0.999665178571429	0.75625	0.0588169642857143	4.56674289703369	0.947018350732596	60.8854322315852	20.8902241229782	117.573120692139
FE	1.81572465213349	0.385536638590555	0.105133751117165	1.12479581394386	0.906858202038925	0.999652455977757	0.696014828544949	0.0625579240037071	4.90210819244385	0.940750001853981	78.9659282912924	30.2330881779785	113.269104666801
FE	1.95206283072631	0.422741845824548	0.152332358741737	1.69940557849069	0.978049597855228	0.993800268096515	0.865951742627346	0.0648458445040214	5.99312162399292	0.981855122798626	80.0720642863603	32.4900721912651	156.624192922028
FE	2.02863973176859	0.445891639788523	0.192528588480707	1.80772403025938	0.955885113572367	0.98545147362493	0.851511169513798	0.0624178712220762	5.54976797103882	0.990544798870002	73.8493202583112	29.2358161721077	139.801788822996
FE	1.93003379352713	0.343791642300351	0.199344898287077	1.84554962920709	0.961413484971568	0.999289195775792	0.828391551584078	0.0587936636880585	5.03416967391968	0.980757362508857	68.3141042447996	29.5507441739616	129.225456760735
FE	1.86388208786649	0.342189361275901	0.14742237024653	1.44095017667592	0.941176470588235	0.997737556561086	0.772247360482655	0.0604395604395604	5.11946439743042	0.961690234677674	74.1875762688853	30.2330881779785	121.798404717012
FE	1.93078709341177	0.513478060703448	0.128396521740997	1.71532516946148	0.919177696423543	0.99943677837229	0.638411715009856	0.0640664601520698	5.8378438949585	0.939960447848704	80.7019202900682	30.8629441816864	93.1924445486126
FE	2.01616508899055	0.547809490626716	0.159651922799106	1.98589480874282	0.9138802020688	0.998436372383931	0.637960067356267	0.0605003608371422	6.01279449462891	0.945181132642586	77.4547922757212	30.9941641824589	109.096308642237
FE	1.79317262479987	0.407338833877727	0.122585826658574	1.38825707600057	0.9419795221843	0.999512432959532	0.749390541199415	0.0653339834227206	5.81757926940918	0.945090247096209	78.4067042860932	30.8367001815319	107.652888633739
FE	1.58352780516546	0.281349977717802	0.127361377965244	1.2960991166655	0.997838422048095	0.999189408268036	0.857335855174277	0.196028100513375	4.0335578918457	0.924615261138227	59.3632802226249	23.2259401367283	97.1290445717869
FE	2.03437683904525	0.418614456430167	0.153553573491402	1.52813665599893	0.96943231441048	0.988048724431165	0.801195127556883	0.0620547000689497	5.77910709381104	0.965766878890938	86.7095283063607	34.7995442048607	114.187644672209
FE	1.51695512787329	0.389699302671569	0.103139885737909	1.45530972825182	0.662726176115802	0.999638118214716	0.662726176115802	0.0680337756332931	4.33462953567505	0.936270735005153	54.8907842029715	17.5309921032028	108.781380640383
FE	2.04938710731567	0.626684751961556	0.123315846551264	1.94556910272695	0.62188044109112	0.996807893209518	0.578641903656413	0.0744341265235055	6.39180278778076	0.890470174291738	75.4965362603787	22.6223281331749	90.4368245323906
FE	2.14466828860812	0.555052578226147	0.170811634705396	1.94961710553791	0.990865766481334	0.988780778395552	0.756552819698173	0.0657267672756156	6.49161720275879	0.978333708183342	88.4526483099466	36.4004282142849	132.164784778038
